1 A probabilistic approach to explore signal execution mechanisms with limited  
2 experimental data

3

4 Michael A. Kochen<sup>1</sup>, Carlos F. Lopez<sup>1,2,\*</sup>

5

6 <sup>1</sup> Department of Biomedical Informatics, Vanderbilt University, Nashville, TN

7 <sup>2</sup> Department of Biochemistry, Vanderbilt University, Nashville, TN

8

9 \* To whom correspondence should be addressed.

10 Email: [c.lopez@vanderbilt.edu](mailto:c.lopez@vanderbilt.edu)

11

## 12 **Abstract**

13 Mathematical models of biochemical reaction networks are central to the study of dynamic  
14 cellular processes and hypothesis generation that informs experimentation and validation.  
15 Unfortunately, model parameters are often not available and sparse experimental data leads to  
16 challenges in model calibration and parameter estimation. This can in turn lead to unreliable  
17 mechanistic interpretations of experimental data and the generation of poorly conceived  
18 hypotheses for experimental validation. To address this challenge, we evaluate whether a  
19 Bayesian-inspired probability-based approach, that incorporates available information  
20 regarding reaction network topology and parameters, can be used to qualitatively explore  
21 hypothetical biochemical network execution mechanisms in the context of limited available  
22 data. We test our approach on a model of extrinsic apoptosis execution to identify preferred  
23 signal execution modes across varying conditions. Apoptosis signal processing can take place  
24 either through a mitochondria independent (Type I) mode or a mitochondria dependent (Type  
25 II) mode. We first show that *in silico* knockouts, represented by model subnetworks,  
26 successfully identify the most likely execution mode for specific concentrations of key  
27 molecular regulators. We then show that changes in molecular regulator concentrations alter  
28 the overall reaction flux through the network by shifting the primary route of signal flow  
29 between the direct caspase and mitochondrial pathways. Our work thus demonstrates that  
30 probabilistic approaches can be used to explore the qualitative dynamic behavior of model  
31 biochemical systems even with missing or sparse data.

32

33

34

35

36

37

38

39

40

41

42

43

44

## 45 Introduction

46 The complex dynamics of biochemical networks, stemming from numerous interactions and  
47 pathway crosstalk, render signal execution mechanisms difficult to characterize [1, 2, 3].  
48 Mathematical modeling of biochemical networks has become a powerful compliment to  
49 experimentation for generating hypotheses regarding the underlying mechanisms that govern  
50 signal processing and suggesting targets for further experimental examination [4, 5]. Models of  
51 biochemical reaction networks, often based on a mass action kinetics formalism, are built to  
52 represent known pathway mechanics with knowledge garnered from years or even decades of  
53 experimentation [6, 7]. Although these models have yielded important predictions and insights  
54 about biochemical network processes, they also depend on kinetic rate parameters and protein  
55 concentrations that are often poorly characterized or simply unavailable. A typical workaround  
56 is to employ model calibration methods to estimate suitable parameter values via optimization  
57 to protein concentration time course data [8, 9, 10]. However, the data needed for parameter  
58 optimization is often scarce, leading to the possibility of multiple parameter sets that fit the  
59 model to that data equally well but exhibit different dynamics. [7, 9]. This poses a challenge for  
60 the study of dynamic network processes as the mode of signal execution can be highly  
61 dependent on a specific parameter set and could in turn lead to inadequate model-based  
62 interpretation. A computational approach that enables the exploration of biochemical signal  
63 execution mechanisms from a probabilistic perspective, constrained only by available data,  
64 would facilitate a rigorous exploration of network dynamics and accelerate the generation of  
65 testable mechanistic hypotheses [11].

66 In this work, we investigate whether a Bayesian-inspired probabilistic approach can identify  
67 network signal execution mechanisms in extrinsic apoptosis restricted only by experimental  
68 observations. Two execution phenotypes have been identified for extrinsic apoptosis signaling:  
69 a mitochondria independent (Type I) phenotype, whereby initiator caspases directly activate  
70 effector caspases and induce cell death, and a mitochondria dependent (Type II) phenotype  
71 whereby initiator caspases engage the Bcl-2 family of proteins, which ultimately lead to effector  
72 caspase activation (see Box 1 for biology details). Most mammalian cells execute apoptosis via  
73 the Type II mechanism, yet the Type I mechanism plays a central role in specific cell types,  
74 particularly certain types of lymphocytes [12]. A significant body of experimental and modeling  
75 work has identified key regulators for Type I vs Type II execution (see Box 1). However, it is still  
76 unclear how network structure and the interplay among multiple regulators can modulate  
77 signal execution for either cell type. A more traditional approach would prescribe intricate and  
78 detailed experimental measurements of cellular response to yield the desired data and improve  
79 our understanding of signal execution. However, the time and cost associated with such  
80 experiments makes it unlikely, and at times infeasible, to obtain said data. It is here that we see  
81 probabilistic inference approaches as complementary to experimentation, providing qualitative  
82 insights about signal execution mechanisms by integrating the expected parameter space  
83 subject only to available computer time. Here we demonstrate that a probabilistic approach,  
84 constrained by network structure or molecular concentrations, can identify the dominant signal  
85 execution modes in a reaction network. Specifically, we demonstrate the dependence of Type I  
86 or a Type II cellular apoptosis execution on network structure and chemical-species

87 concentrations. We use expected values for quantifiable in silico experimental outcomes as  
88 metrics for comparisons of signal flow through different pathways of the network and  
89 subnetworks in order to identify how regulators affect execution modes. We introduce two  
90 complementary approaches that can be used in tandem to explore signal execution  
91 modulation. We first define a *multimodel exploration method* to explore multiple hypothesis  
92 about apoptosis execution by deconstructing an established apoptosis network model into  
93 functional subnetworks that effectively represent in silico knockout experiments. We also  
94 define a *pathway flux method* to characterize the signal flux through specific network pathways  
95 within the chosen canonical network. Combined, these two approaches enable us to  
96 qualitatively identify key network components and molecular regulator combinations that yield  
97 mechanistic insights about apoptosis execution. Our approach is generalizable to other mass  
98 action kinetics-based networks where signal execution modes play important roles in cellular  
99 outcomes. This work leverages Nested Sampling algorithm methods to efficiently calculate  
100 expected values on high performance computing (HPC) platforms, both of which are seldom  
101 used in biological applications. In this manner we are able to carry out the necessary  
102 calculations to consider the entirety of the proposed parameter space and estimate expected  
103 values within the timespan of hours to days.

## 104 **Methods**

### 105 **Apoptosis model and simulations**

106 The base model used in this work is a modified version of the Extrinsic Apoptosis Reaction  
107 Model (EARM) from Lopez et al. (EARM v2.1) [7]. The original EARM was simplified to reduce  
108 complexity and lower the number of parameters, but still retains the key features of the  
109 network for apoptosis execution. Specifically, we reduced the molecular complexity of  
110 mitochondrial outer membrane permeabilization (MOMP) down to a representative set of Bcl-2  
111 proteins that capture the behavior of activators, inhibitors, effectors, and sensitizers. We also  
112 eliminated intermediate states for Cytochrome c and Smac to streamline effector caspase  
113 activation, and we added an explicit FADD molecule, an adapter protein in the death-inducing  
114 signaling complex (DISC), to achieve a more realistic representation of signal initiation. Overall,  
115 EARM v2.1 is comprised of 16 chemical species at non-zero initial concentrations, 50 total  
116 chemical species, 62 reactions, and 62 kinetic parameters. The modified model was recalibrated  
117 to recapitulate the time-dependent concentration trajectories of truncated Bid, Smac release  
118 from the mitochondria, and cleaved PARP analogous to the approach reported previously [42]  
119 (Figure S1). The modified EARM, and all derivative models, were encoded in PySB. All  
120 simulations were run using the mass action kinetics formalism as a system of ordinary  
121 differential equations (ODEs) using the VODE integrator in SciPy within the PySB modeling  
122 framework. All data results, representative models, and software are distributed with open-  
123 source licensing and can be found in the GitHub repository <https://github.com/LoLab-VU/BIND>.

### 124 **Expected value estimation**

125 The expected value for a quantifiable outcome is, by definition, the integral of an objective  
126 function that represents that outcome over the normalized distribution of parameters. This is  
127 analogous to the estimation of Bayesian evidence where a likelihood function is likewise  
128 integrated over a normalized distribution. We can thus use existing, established, Bayesian

129 evidence estimation methods and software to estimate expected values by simply substituting  
130 the objective function for the likelihood function in the integral calculation. The remainder of  
131 this section and the next provide an overview of the evidence estimation methods and tools  
132 that we have repurposed for expected value calculations.

133 Bayesian evidence is the normalizing term in a Bayesian calculation and typically provides a  
134 measure for model comparison with regard to their fit to experimental data. It is expressed as:

$$135 \quad P(D|M) = \int L(D|\theta, M) P(\theta|M) d\theta \quad (1)$$

136 Where  $M$  is the model under consideration,  $D$  is the experimental data,  $\theta$  is a specific set of  
137 parameter values,  $L(D|\theta, M)$  is the likelihood function describing the fit of the data to the  
138 model under those parameter values, and  $P(\theta|M)$  is the prior distribution of parameters. An  
139 efficient method for evidence calculation is nested sampling. This method simplifies the  
140 evidence calculation by introducing a prior mass element  $dX = P(\theta|M) d\theta$  that is estimated by  
141  $(X_{i-1} - X_i)$  where  $X_i = e^{-i/N}$ ,  $i$  is the current iteration of the algorithm, and  $N$  is the total  
142 number of live points. The evidence is then written as

$$143 \quad Z = \int_0^1 L dX \approx \sum_{i=1}^N L_i (X_{i-1} - X_i) \quad (2)$$

144 Initialization of the algorithm is carried out by randomly selecting an initial population of  
145 parameter sets (points in parameter space) from the prior distribution, scoring each one with  
146 the likelihood function, and ranking them from  $L_{high}$  to  $L_{low}$ . At each iteration of the algorithm  
147 a new set of parameter values is selected and scored. If that score is higher than  $L_{low}$ , then it is  
148 added to the population, at the appropriate rank, and  $L_{low}$  is removed from the population and  
149 added to the evidence sum (2).

### 150 **Nested sampling software**

151 All expected value estimates in this work are calculated with MultiNest, a nested sampling-  
152 based algorithm designed for efficient evidence calculation on highly multimodal posterior  
153 distributions [44, 45]. MultiNest works by clustering the live points (population of parameter  
154 sets) and enclosing them in ellipsoids at each iteration. The enclosed space then constitutes a  
155 reduced space of admissible parameter sets. This lowers the probability of sampling from low  
156 likelihood areas and evaluating points that will only be discarded. The evidence estimate is  
157 accompanied by an estimate of the evidence error. The algorithm terminates when the  
158 presumed contribution of the highest likelihood member of the current set of live points,  
159  $L_{high} X_i$  is below a threshold. Here, we use a threshold of 0.0001 and a population size and  
160 16,000 unless otherwise noted. The population size of 16,000 was found to be an acceptable  
161 compromise between precision and computational austerity for the model sizes and in silico  
162 experiments performed in this study. See [44, 45], for more details on the MultiNest algorithm.  
163 We use MultiNest with the Python wrapper PyMultiNest [46], which facilitates the integration  
164 with PySB into the parameter sampling pipeline.

### 165 **Multimodal exploration analysis**

166 We carried out an analysis analogous to knockout experiments to investigate the contribution  
167 of different network components to the overall dynamics of the apoptosis execution network.  
168 We broke down the EARM network into six subnetworks and compared their likelihood of  
169 achieving apoptosis across increasing concentrations of the regulator XIAP. A standard proxy for  
170 apoptosis execution is cleavage of the protein PARP. We therefore define the proportion of  
171 cleaved PARP, relative to total PARP, as a metric for effective apoptosis execution. We defined  
172 the objective function that represents the amount of cleaved PARP as:

$$173 \quad Obj_{multimodel} = \frac{cPARP}{tPARP} \quad (3)$$

174 where  $cPARP$  is the amount of PARP that has been cleaved and  $tPARP$  is the total amount of  
175 PARP in the system. When this objective function is substituted into equation (1) in place of the  
176 likelihood function, we obtain the expected value, the average over the chosen prior parameter  
177 range, for the proportion of PARP that has been cleaved at the end of the in silico experimental  
178 simulation. We compare PARP cleavage for different subnetworks and regulatory conditions  
179 only in qualitative terms and as a *relative* measure of the expected outcome.

### 180 **Pathway flux analysis**

181 We also explored the effect of molecular regulators of Type I vs Type II execution relative to the  
182 apoptosis signal flux through the network, as we have done in previous work [49]. Briefly, signal  
183 flux is defined as the chemical reaction flux in units of molecules per unit time, that traverses  
184 through a given pathway. In the apoptosis network there are two potential pathways that can  
185 lead to Caspase-3 activation and subsequently PARP cleavage. In the direct caspase pathway  
186 initiator caspases, represented here as “Caspase-8”, directly cleave and activate the effector  
187 caspases, represented here as “Caspase-3”. By contrast, in the mitochondrial pathway, effector  
188 caspases are activated via the apoptosome, and are dependent on MOMP. Therefore, the  
189 dominant pathway responsible for Caspase-3 activation defines the route of the signal. To  
190 estimate the flux through one of these pathways, we define the objective function as:

$$191 \quad Obj_{pathway} = \sum_{t=0}^T \frac{\sum_0^t C3_{pathway}}{\sum_0^t C3_{total}} \times (cParp_t - cParp_{t-1}) \quad (4)$$

192 where  $t$  represents time in seconds,  $\sum_0^t C3_{pathway}$  is the amount of Caspase-3 activated via the  
193 target pathway up to time  $t$ ,  $\sum_0^t C3_{total}$  is the total Caspase-3 activated up to time  $t$ ,  
194 and  $\sum_0^t C3_{caspase} / \sum_0^t C3_{total}$  is the proportion of activated Caspase-3 that was produced via  
195 the target pathway up to time  $t$ .  $(cParp_t - cParp_{t-1})$  is the total PARP that has been cleaved,  
196 and activated, by Caspase-3 from time  $t - 1$  to time  $t$ . Thus, at any given time  $t$  we can estimate  
197 the amount of Caspase-3 that has been activated through a specific pathway. Multiplication of  
198 these two terms returns an estimate for the amount of PARP cleaved via the specific pathway  
199 at time  $t$ . Summing over  $T$  then returns an estimate for the total apoptosis signal flowing  
200 through the target pathway. Like the PARP cleavage objective function, the signal flux objective  
201 substituted into equation (1) produces an estimate of the average flux over a defined prior  
202 distribution. We estimated this quantity over increasing concentrations of the molecular  
203 regulator XIAP, but also at high and low levels of the DISC components FADD and Caspase-8.

204 The total signal flux was estimated by summing the flux estimate for both the direct caspase  
205 and mitochondrial pathways.

### 206 **Parameter ranges and initial conditions**

207 The prior distribution takes the form of a set of parameter ranges, one for each reaction rate  
208 parameter. The ranges used here span four orders of magnitude around generic reaction rates  
209 deemed plausible [4] and are specific to the type of reaction taking place. The ranges of  
210 reaction rate parameters, in  $\text{Log}_{10}$  space, are 1<sup>st</sup> order forward: [-4.0, 0.0], 2<sup>nd</sup> order forward: [-  
211 8.0, -4.0], 1<sup>st</sup> order reverse: [-4.0, 0.0], catalysis: [-1.0, 3.0]. These ranges were also used in the  
212 calibration of the base model. Where possible, initial conditions were either collected from the  
213 literature [50, 51] or taken from a previous model of extrinsic apoptosis [7, 52]. Because the  
214 baseline model was designed to concur with Type II apoptotic data (see above), literature  
215 derived initial conditions were based on Type II Jurkat or Hela cell lines (Table S1).

### 216 **Expected value ratios**

217 Evidence estimates are often used to select between two competing models by calculating the  
218 Bayes factor (i.e. the ratio of their evidence values). This provides a measure of confidence for  
219 choosing one model over another. We can likewise use the ratios of expected values to gain  
220 additional insights into the dynamical relationship between network components. To facilitate  
221 construction of expected value ratios (EVR) with a continuous and symmetric range, we define  
222 them as:

$$223 \quad EVR = \begin{cases} -\frac{Z_2}{Z_1} + 1 & \text{if } Z_1 < Z_2 \\ \frac{Z_1}{Z_2} - 1 & \text{if } Z_1 > Z_2 \end{cases}$$

224 where  $Z_1$  and  $Z_2$  are the expected value estimates for two networks under comparison.

### 225 **Computational resources**

226 Because of the high computational workload necessary for this analysis, a wide range of  
227 computational resources were used. The bulk of the work was done on the ACCRE cluster at  
228 Vanderbilt University which has more than 600 compute nodes running Intel Xeon processors  
229 and a Linux OS. As many as 300 evidence estimates were run in parallel on this system.  
230 Additional resources included two local servers, also running Intel processors and a Linux OS, as  
231 well as a small local four node cluster running Linux and AMD Ryzen 1700 processors. A  
232 detailed breakdown of CPU time can be found in the results section. In all, expected value  
233 estimates for 14 different networks/initial conditions were made across the range of XIAP  
234 concentrations. We estimate all 14 runs would take ~9 days each on a typical university server  
235 with 32 cores/64 threads.

## 236 **Results**

### 237 **Overview: A Bayesian-inspired approach to explore mechanistic hypotheses.**

238 Our overarching goal is to understand the mechanisms and dynamics of biochemical networks  
239 responsible for cellular commitment to fate, given incomplete or unavailable data. We take a  
240 probabilistic approach, similar to those used in Bayesian evidence-based model selection and



241 multimodel inference, to compare model subnetworks and pathways with respect to apoptotic  
242 signal execution under various in silico experimental conditions and enable the generation of  
243 hypotheses regarding the underlying mechanisms of signal processing. Using this approach,  
244 we've employed two distinct but complimentary strategies.

245 The first is *Multimodel Exploration Analysis* (Figure 1, left path), wherein the network model is  
246 deconstructed into biologically relevant subnetworks and the probability of each subnetwork  
247 achieving apoptosis, under various regulatory conditions, is estimated via the calculation of an  
248 expected value for a quantifiable proxy of apoptosis. This differs from traditional model  
249 selection and multimodel inference applications where models are typically ranked based on  
250 their fit to experimental data and high-ranking models may be averaged to obtain a composite  
251 model [47, 48, 53, 54, 55, 56]. Here, we already have a model that captures key features of  
252 programmed cell death execution. Instead, we use the differences in expected values for a  
253 quantity that is representative of apoptosis to construct a composite picture of mechanistic  
254 evidence for apoptosis execution. To achieve this, we first tailor the objective function to  
255 represent signal execution strength, as measured by cleaved PARP concentration at the end of  
256 the simulation. The expected value derived from this objective function therefore describes the  
257 likelihood that the signal is effectively transmitted through a given network. It should be noted  
258 that Bayesian evidence, and by extension our expected value calculation, inherently  
259 incorporates model complexity as the objectives are integrated over normalized prior  
260 distributions [44, 53, 57]. As we will see, comparison of changes in signal strength through  
261 relevant subnetworks allows inferences to be made on the effect of the perturbed network  
262 regulator as well as various network components on the overall dynamics of the system. We  
263 focus primarily on understanding how Bayesian evidence for the caspase pathway compares to  
264 that of the complete network as these are most relevant for the analysis of Type I/II execution  
265 modes. This analysis will inform on how network components contribute to overall signal  
266 execution and provide mechanistic insights about the sensitivity of PARP cleavage to  
267 subnetwork components.

268 The second strategy is *Pathway Flux Analysis* (Figure 1, right path), where we retain the  
269 complete network structure but instead tailor the objective functions to measure biochemical  
270 reaction flux through either the direct caspase or mitochondrial pathways. We primarily  
271 consider the influence of the apoptosis inhibitor XIAP on regulatory dynamics and phenotypic  
272 fate but also consider the regulatory effect of the death inducing signaling complex (DISC) and  
273 the anti-apoptotic protein Bcl-2, all of which have been found to be relevant to Type I vs Type II  
274 execution in different cell types [13, 14]. This analysis will inform on how molecular regulators  
275 modulate biochemical flux through the network and their influence on apoptosis completion as  
276 measured by PARP cleavage.

### 277 **Decomposition of the extrinsic apoptosis network and reductive analysis of the effects of** 278 **XIAP**

279 To investigate the effect of network substructures on apoptosis signaling, we build a composite  
280 description of system dynamics by observing variations in signal throughput, represented by  
281 expected values of PARP cleavage, between subnetworks (Figure 2A-F) relative to changes in  
282 regulatory conditions. We consider relative changes in expected PARP cleavage as the number  
283 of XIAP molecules is increased where a higher value indicates a stronger average signal over the



284 prior range of parameter values. XIAP was varied from 0 to 200,000 molecules per cell in  
285 increments of 250 to explore how changes in XIAP affect the likelihood of apoptosis execution.  
286 For subnetworks that include the mitochondrial pathway, Bcl-2 (an anti-apoptotic protein) was  
287 eliminated, to explore Type I vs Type II activity independent of inhibitors that could confound  
288 signal throughput, and more closely simulate a cell that is “primed” for death [57]. All other  
289 initial values were fixed at the levels shown in supplementary Table S1. In the absence of XIAP  
290 all six subnetworks have PARP cleavage estimates greater than 0.98, (Figure 2 A: 0.993, B:  
291 0.998, C: 0.992, D: 0.981, E: 0.998, F: 0.981, Table S2) indicating a robust apoptotic signal for  
292 each across the allowed range of parameters. The log-expected value version of Figure 2G along  
293 with estimated errors generated by MultiNest are displayed in Figure S2.

294 The results in Jost et al. [14] imply that the cellular level of XIAP determines the preferred  
295 apoptosis pathway with higher levels specific to Type II cells and lower levels specific to Type I.  
296 To hypothesize a possible mechanistic explanation for this behavior we compared the expected  
297 PARP cleavage, over increasing concentrations of XIAP, for the direct caspase activation  
298 network against both the complete network and the isolated mitochondrial pathway network  
299 (Figures 2A and G green; 2E and G orange; 2F G blue respectively). This mimics reported  
300 experimental strategies to study Type I/II phenotypes and allows us to gauge the effect of XIAP  
301 on networks with and without a mitochondrial component [13, 35].

302 As XIAP levels increase we see differential effects on all subnetworks in the form of diverging  
303 expected value estimates, indicating differences in the efficacy of XIAP induced apoptotic  
304 inhibition. PARP cleavage values for the isolated caspase pathway (Figure 2G green) diverge  
305 from the complete network (Figure 2G orange) and mitochondrial pathway (Figure 2 blue)  
306 showing a steeper initial decline that diminishes as XIAP continues to increase. PARP cleavage  
307 values for the caspase pathway falls to 0.5 at an XIAP level of roughly 32,000. However, the  
308 complete network and mitochondrial pathways require XIAP levels nearly threefold higher with  
309 PARP cleavage reaching 0.5 at around 92,000 and 95,000 respectively.

310 Because the direct caspase activation pathway (Figures 2G green) is representative of the Type I  
311 phenotype, the disproportionate drop in its expected PARP cleavage as XIAP concentration  
312 increases is consistent with experimental evidence showing XIAP-induced transition from a  
313 Type I to a Type II execution mode [14]. The complete network, containing the full  
314 mitochondrial subnetwork, and mitochondrial only pathway are also affected by XIAP but  
315 exhibit resistance to its anti-apoptotic effects, a difference that is most prominent at moderate  
316 levels of the inhibitor. This suggests a dependence on mitochondrial amplification for effective  
317 apoptosis as XIAP increases from low to moderate levels. At higher levels of XIAP the PARP  
318 cleavage for the caspase pathway level off and the gaps between it and the two mitochondrial  
319 containing networks narrow. The disproportionate effect of XIAP inhibition of apoptosis on the  
320 caspase pathway suggests that the mechanism for XIAP induced transition to a Type II pathway  
321 can be attributed to differential inhibition of the apoptotic signal through the isolated caspase  
322 pathway vs a network with mitochondrial involvement.

323 The next two highest trends in expected values after that of the direct caspase network belong  
324 to the networks representing direct caspase activation plus mitochondrial activation and  
325 mitochondrial activation alone (Figures 2G purple and 2G brown). For most of the range with

326 XIAP below 100,000 these two networks have largely overlapping PARP cleavage trajectories,  
327 despite the fact that the former has twice as many paths carrying the apoptotic signal. Near an  
328 XIAP level of 100,000 the two trends diverge as the decrease in PARP cleavage for the  
329 mitochondrial activation only network accelerates. This could be explained by XIAP  
330 overwhelming the apoptosome at these higher levels. The apoptosome is an apoptosis inducing  
331 complex (via Caspase-3 cleavage) consisting of Cytochrome c, APAF-1, and Caspase-9, and is an  
332 inhibitory target of XIAP. As XIAP increases past 125,000 the mitochondrial activation only PARP  
333 cleavage values fall below even the solo direct caspase values, possibly due to the two-pronged  
334 inhibitory action of XIAP at both the apoptosome and Caspase-3. An interesting observation  
335 here is that the addition of the direct caspase pathway to the mitochondrial activation pathway  
336 does not appear to increase the likelihood of achieving apoptosis for lower values of XIAP.

337 PARP cleavage values for the network representing direct caspase activation plus mitochondrial  
338 inhibition of XIAP are in red in Figure 2G. Below an XIAP level of 100,000 these values are  
339 consistently above the PARP cleavage values for the network representing direct caspase plus  
340 mitochondrial activation. Note that while direct caspase activation does not appear to increase  
341 the likelihood of achieving apoptosis when added to the mitochondrial activation pathway  
342 (Figure 2G purple) the amplification of the direct caspase activation via mitochondrial inhibition  
343 of XIAP leads to a higher likelihood than solo activation through the mitochondria. This suggests  
344 the possibility that the primary mechanism for mitochondrial apoptotic signal amplification,  
345 under some conditions, may be inhibition of XIAP, with direct signal transduction a secondary  
346 mechanism. Above an XIAP level of 100,000, the direct caspase with XIAP inhibition PARP  
347 cleavage values drop to levels roughly in line with the values for direct caspase activation plus  
348 mitochondrial activation, possibly due to the fact that Smac, the mitochondrial export that  
349 inhibits XIAP, is also set to 100,000 molecules per cell. Both, however, remain more likely to  
350 attain apoptosis than direct caspase activation alone.

351 The two subnetworks with the highest expected values for apoptotic signal execution are the  
352 complete network and the isolated mitochondrial pathway (Figures 2E orange and 2F blue). As  
353 previously mentioned, both of these networks contain the full mitochondrial pathway implying  
354 that this pathway supports resistance to XIAP inhibition of apoptosis. Between XIAP levels of 0  
355 to 100,000 the two trends track very closely, with the mitochondrial only pathway showing a  
356 slight but consistent advantage for apoptosis execution. The average difference between an  
357 XIAP level of 20,000 and 80,000 is roughly 0.014, meaning we expect the average PARP  
358 cleavage to favor the mitochondrial only pathway by about 1.4 percentage points, which may  
359 seem unremarkable. Context matters however, and the context here is that the complete  
360 network has potentially twice the bandwidth for the apoptotic signal, namely the addition of  
361 the more direct caspase pathway. Together, this raises the possibility that under some  
362 conditions the caspase pathway is not a pathway but a sink for the apoptotic signal. In such a  
363 scenario, the signal through the caspase pathway would get lost as Caspase-3 is degraded by  
364 XIAP. Not until the signal through the mitochondrial pathway begins inhibiting XIAP could the  
365 signal proceed. Around the 100,000 level of XIAP the PARP cleavage trend for the mitochondrial  
366 pathway crosses below that for the complete network. This could be due to the parity with  
367 Smac, components of the apoptosome, or a combination of the two.

368

### 369 **Apoptosis signal strength dictates the signal route through the network**

370 The results in Scaffidi et al. [13] indicate a strong phenotypic dependence on the strength of the  
371 apoptosis signal. Here we examine hypotheses made in that work and the interplay between  
372 the DISC and XIAP regulatory axes. We again increase XIAP from 0 to 200,000 molecules in  
373 increments of 250, but this time at a low number of DISC complexes by lowering the initial  
374 values of both the scaffold protein FADD and the initiator Caspase-8, from 130,000 to 100  
375 molecules per cell. In addition to the *Multimodel Exploration Analysis* approach used in the  
376 previous section, we also use the *Pathway Flux Analysis* approach using the signal flux objective  
377 function (see Methods). In this way we attain a holistic view of network dynamics that  
378 incorporates both network structure and signal flux crosstalk from all possible pathways.  
379 Additional analysis of caspase and mitochondrial pathway signal flux over a range of values for  
380 both XIAP and Bcl-2 is displayed in Figure S3 and interpreted in Text S1.

381 Figure 3A displays the PARP cleavage expected values along with their low DISC counterparts.  
382 Two things are immediately apparent. PARP cleavage for the caspase pathway with a low  
383 number of DISC molecular components is lower across the entire range of XIAP concentrations.  
384 The complete network, on the other hand, shows almost no difference under low DISC  
385 conditions at lower values of XIAP. This supports the hypothesis that mitochondrial  
386 involvement is necessary to overcome weak DISC formation and that weak signal initiation  
387 constitutes a Type II trait [13].

388 Figures 3B and 3C show expected values for signal flux through the caspase pathway and  
389 complete network, for high and low numbers of DISC components, respectively. At higher DISC  
390 values, signal flux through the caspase pathway is consistently higher than the flux through the  
391 mitochondrial pathway. At lower DISC values the signal flux through the mitochondrial pathway  
392 exceeds the flux through the caspase pathway. These results shed interesting mechanistic  
393 observations in the context of a previously proposed hypothesis stating that mitochondrial  
394 activation is downstream of Caspase-8 activation in Type I cells and upstream in Type II cells. If  
395 a weaker initial apoptosis cue does indeed push the signal through the mitochondrial pathway  
396 the initial activation of Caspase-8 would be weak and the amplifying activity of the  
397 mitochondria would ramp up the signal before Caspase-8 could directly activate Caspase-3. On  
398 the other hand, strong initial activation that pushes the signal through the caspase pathway  
399 would activate both Caspase-8 and Caspase-3 before MOMP becomes fully active. Also notable  
400 is the nearly identical trajectories of the total signal flux through the low and high DISC models.  
401 The average difference over the range of XIAP was only 0.011 (Table S3). This is consistent with  
402 observations that both Type I and Type II cells respond equally well to receptor mediated  
403 apoptosis [13].

404 Overall these results set up three mechanistic explanations for apoptosis execution. On one  
405 end, strong signal initiation and low XIAP results in the independence of apoptosis from the  
406 mitochondrial pathway. This behavior is consistent with Type I cells like the SKW6.4 cell lines  
407 [13]. Under this scenario our results imply that the majority of the signal flux is carried through  
408 the caspase pathway and we hypothesize that control of apoptosis is dominated by that  
409 pathway. On the other end of the spectrum weak signal initiation and moderate to high levels  
410 of XIAP result in a dependence on the mitochondrial pathway. Such behavior is consistent with  
411 Type II cells like Jurkat [13]. In this case our results strongly indicate that the majority of signal

412 flux is carried through the mitochondrial pathway and we hypothesize that apoptosis execution  
413 is dominated by that pathway. In between these two extremes is the case with strong signal  
414 initiation, and moderate to high levels of XIAP levels with apoptotic dependence on  
415 mitochondrial activity. Such a scenario that is consistent with MCF-7 cell that are known to have  
416 traits of both phenotypes [13]. In this case, we found that the majority of the apoptotic signal is  
417 carried through the caspase pathway despite the dependence on the mitochondria and we  
418 hypothesize that the mitochondrial pathway acts to allow the apoptotic signal through the  
419 caspase pathway.

#### 420 **Expected value ratios and XIAP influence on Type I/II apoptosis phenotype**

421 Model selection methods typically calculate the evidence ratios, or Bayes factors, to choose a  
422 preferred model and estimate the confidence of that choice [59, 60]. When comparing changes  
423 in likelihood of an outcome as regulatory conditions are altered we can similarly use ratios of  
424 expected values to provide additional information about evolving network dynamics under  
425 regulatory perturbations. To characterize the effect of XIAP on the choice of Type I or II  
426 apoptotic phenotype we calculated the expected value ratios (Figure 4A), for each value of XIAP  
427 between the caspase pathway and both the complete network and mitochondrial pathway. In  
428 these calculations, the denominator represents the caspase pathway so that higher values favor  
429 a need for mitochondrial involvement. An interesting feature of both the complete and  
430 mitochondrial expected value ratios is the peak and reversal at a moderate level XIAP (Figure  
431 4B). This reflects the initially successful inhibition of the caspase pathway that decelerates  
432 relatively quickly as XIAP increases, and a steadier rate of increased inhibition on networks that  
433 incorporate the mitochondrial pathway. The ratios peak between 45,000 and 50,000 molecules  
434 of XIAP (more than double the value of its target molecule Caspase-3 at 21,000) and represent  
435 the optimal level of XIAP for the requirement of the mitochondrial pathway and attainment of a  
436 Type II execution. Given the near monotonic decline of the expected values for both pathways,  
437 representing increasing suppression of apoptosis, the peak and decline in the expected value  
438 ratios could represent a shift toward complete apoptotic resistance. Our results therefore  
439 complement the observations in Aldridge et al. where a similar outcome was observed  
440 experimentally [52].

441 A common technique to study apoptosis is to knockdown Bid, overexpress Bcl-2, or otherwise  
442 shut down MOMP induced apoptosis through mitochondrial regulation. This strategy was used  
443 in Jost et al. [14] to study the role of XIAP in apoptosis and in the work of Aldridge et al. to  
444 explore Type I vs Type II execution in different cell lines [60]. Taking a similar approach, we set  
445 Bcl-2 levels to 328,000 molecules per cell, in line with experimental findings [47], to suppress  
446 MOMP activity and recalculated the PARP cleavage expected values and their ratios (Figures 4C  
447 and 4D, Table S5). Under these conditions PARP cleavage for the mitochondrial pathway drop  
448 well below that of the direct caspase pathway, which is reflected in the expected value ratios  
449 trend as a shift into negative territory and indicate that the caspase pathway is favored. PARP  
450 cleavage for the complete network under MOMP inhibition is shifted closer to that for the  
451 caspase pathway at higher concentrations of XIAP but is still higher throughout the full range of  
452 XIAP. The peak in the associated expected value ratios is flattened as the level of XIAP increases  
453 from low levels, suggesting that increasing XIAP is less likely to induce a transition to a Type II  
454 phenotype in a system with an already hampered mitochondrial pathway. We note that

455 complete inhibition of MOMP would result in uninformative mitochondrial pathway results.  
456 PARP cleavage expected values for the complete network would be indistinguishable from  
457 those for the direct caspase pathway and the complete/caspase ratios would simply flatline.  
458 However, our analysis shows that isolation of active biologically relevant subnetworks and  
459 direct comparison under changing molecular regulatory conditions, using trends in expected  
460 values, enables the extraction of information regarding pathway interactions and differential  
461 network dynamics.

#### 462 **Precision vs computational cost**

463 Increasing the precision of the expected value estimates and tightening their trendlines, is  
464 accomplished by increasing the number of live points in the nested sampling algorithm. The  
465 trade-off is an increase in the number of evaluations required to reach the termination of the  
466 algorithm and an accompanying increase in total computation time. Figures 5A and 5B display  
467 the required number of evaluations for the direct caspase and complete network at population  
468 sizes of 500, 1000, 2000, 4000, 8000, and 16,000, when run with the PARP cleavage objective  
469 function. For both models the number of evaluations roughly doubles for every doubling in  
470 population size. Figures 5C and 5D are the average estimated errors calculated by the MultiNest  
471 algorithm over each population size for the direct caspase and complete networks respectively.  
472 As expected, error estimates fall roughly as  $n^{-1/2}$  [61], signifying clear diminishing returns as  
473 the number of live points is increased. The average CPU process times, as estimated by  
474 Python's `time.clock()` method, are given in Figures 5E and 5F for the direct caspase and  
475 complete networks respectively. Despite the greater number of required evaluations for the  
476 direct caspase network the average clock times for the complete network is significantly higher.  
477 At a population of 16,000 the caspase network had an average clock time of 11,964 seconds  
478 compared to 76,981 for the complete network. Data for figure 5 can be found in Table S6.

479 Ultimately, the choice of population size for the methods we have laid out here will depend on  
480 the networks to be compared, the objective function, and how well the trends in the expected  
481 values must be resolved in order to make inferences about network dynamics. For example, at  
482 a population size of 500 the trend in the PARP cleavage expected values for the direct caspase  
483 pathway is clearly discernable from that for the mitochondrial pathway and the complete  
484 network, but the latter two are largely overlapping (Figure S4A). At higher population levels,  
485 however, two distinct mitochondrial and complete PARP cleavage trends become apparent  
486 (Figure S4K). If expected value ratio trends are desired then the choice of population size must  
487 take into consideration the amplification of the noise from both expected value estimates (see  
488 Figures S4(B, D, F, H, J, L) for complete/caspase PARP cleavage expected value trends).

#### 489 **Discussion**

490 Characterizing information flow in biological networks, the interactions between various  
491 pathways or network components, and shifts in phenotype upon regulatory perturbations is a  
492 standing challenge in molecular biology. Although comparative analysis of signal flow within a  
493 network is possible with current computational methods, the dependence of physicochemical  
494 models on unknown parameters makes the computational examination of each network  
495 component highly dependent on costly experimentation.



496 To take advantage of the enormous amount of existing knowledge encoded in these  
497 physicochemical networks without the dependence on explicit parameter values we take a  
498 probabilistic approach to the exploration of changes in network dynamics. By integrating an  
499 objective function that represents a simulated outcome over parameter distributions derived  
500 from existing data we obtain the likelihood of attaining that outcome given the available  
501 information about the signaling pathways. The qualitative exploration of network behavior for  
502 various in silico experimental setups and regulatory conditions is then attainable without  
503 explicit knowledge of the parameter values. We demonstrate the utility of the method when  
504 applied to the regulation of extrinsic apoptosis. Networks that incorporate an active  
505 mitochondrial pathway displayed a higher resistance to apoptotic inhibition from increasing  
506 levels of XIAP, consistent with experimental evidence that XIAP induces a Type II phenotype  
507 [14]. Also in line with experimental evidence [13] are the results that suggest low/high signal  
508 initiation is consistent with Type II/I phenotype respectively and that both types achieve  
509 apoptosis equally well.

510 A potential limitation of this probabilistic approach to the study network dynamics is the  
511 computational cost. A number of factors affect the run time of the algorithm including the size  
512 of the model, the objective function, and the desired precision. Fortunately, reducing the  
513 resolution (the number of in silico experiments for which an expected value is estimated) and  
514 the precision (the population size) can drastically reduce the cost and in many cases the  
515 method will still be viable. One aspect of the method that is severely restrictive is the number  
516 of model components that can be varied in the same run since the computational cost  
517 increases exponentially with each additional variable. Reasonable parameter distributions must  
518 also be chosen, preferably based on existing data. Here we were able to use generic but  
519 biologically plausible ranges with uniform distributions to produce results that were  
520 qualitatively consistent with previous experimental results. These in silico generated qualitative  
521 results allow us to make mechanistic hypotheses from existing data over a period of weeks  
522 rather than the months or years that would be required to attain this information with  
523 experimental approaches. Our results therefore support probabilistic approaches as a suitable  
524 complement to experimentation and a shift from purely deterministic models with a single  
525 optimum parameter set to a probabilistic understanding of mechanistic models of cellular  
526 processes.

## 527 **Conclusions**

528 In this paper we have developed a probabilistic approach to the qualitative analysis of the  
529 network dynamics of physicochemical models. It is designed to incorporate all available  
530 knowledge of the reaction topology, and the parameters on that topology, and calculate the  
531 likelihood of achieving an outcome of interest. Inferences on network dynamics are then made  
532 by repeating this calculation under changing regulatory conditions and various in silico  
533 experiments. We tested the method against a model of the extrinsic apoptosis system and  
534 produced qualitative results that were consistent with several lines of experimental research.  
535 To our knowledge this is the first attempt at a probabilistic analysis of network dynamics for  
536 physicochemical models and we believe this method will prove valuable for the large-scale  
537 exploration of those dynamics, particularly when parameter knowledge and data are scarce.

## 538 **Acknowledgements**

539 This work was supported by the NIH NCI U01CA215845 (CFL), as well as NSF MCB 1411482 (CFL)  
540 We thank the Incyte-Vanderbilt Alliance (CFL) for their support of this project. We also thank  
541 the Advanced Computing Center for Research and Education (ACCRE) for computational  
542 resources and support needed to complete this work. Finally, we extend our thanks to Dr Blake  
543 Wilson for his effort in reviewing this work and providing feedback.

544

545

546

547

548

549

550

551

552

553

554

555

556

557

558

559

560

561

562



## 563 References

- 564 1. Bhalla US, Iyengar R. Emergent Properties of Networks of Biological Signaling Pathways.  
565 Science. 1999 Jan 15;283(5400):381–7.
- 566 2. Loscalzo J, Barabasi A-L. Systems biology and the future of medicine. Wiley  
567 Interdisciplinary Reviews: Systems Biology and Medicine. 2011;3(6):619–27.
- 568 3. Kitano H. Computational systems biology. Nature. 2002 Nov;420(6912):206–10.
- 569 4. Aldridge BB, Burke JM, Lauffenburger DA, Sorger PK. Physicochemical modelling of cell  
570 signalling pathways. Nat Cell Biol. 2006 Nov;8(11):1195–203.
- 571 5. Le Novère N. Quantitative and logic modelling of molecular and gene networks. Nature  
572 Reviews Genetics. 2015 Mar;16(3):146–58.
- 573 6. Albeck JG, Burke JM, Spencer SL, Lauffenburger DA, Sorger PK. Modeling a Snap-Action,  
574 Variable-Delay Switch Controlling Extrinsic Cell Death. PLOS Biology. 2008 Dec  
575 2;6(12):e299.
- 576 7. Lopez CF, Muhlich JL, Bachman JA, Sorger PK. Programming biological models in Python  
577 using PySB. Molecular Systems Biology. 2013 Jan 1;9(1):646.
- 578 8. Riel V, A.w N. Dynamic modelling and analysis of biochemical networks: mechanism-  
579 based models and model-based experiments. Brief Bioinform. 2006 Dec 1;7(4):364–74.
- 580 9. Shockley EM, Vrugt JA, Lopez CF. PyDREAM: high-dimensional parameter inference for  
581 biological models in python. Bioinformatics. 2018 Feb 15;34(4):695–7.
- 582 10. Mitra ED, Suderman R, Colvin J, Ionkov A, Hu A, Sauro HM, et al. PyBioNetFit and the  
583 Biological Property Specification Language. arXiv:190307750 [q-bio] [Internet]. 2019 Mar  
584 18 [cited 2019 Nov 1]; Available from: <http://arxiv.org/abs/1903.07750>
- 585 11. Wrede F, Hellander A. Smart computational exploration of stochastic gene regulatory  
586 network models using human-in-the-loop semi-supervised learning. bioRxiv. 2018 Dec  
587 8;490623.
- 588 12. Scaffidi C, Schmitz I, Zha J, Korsmeyer SJ, Krammer PH, Peter ME. Differential Modulation  
589 of Apoptosis Sensitivity in CD95 Type I and Type II Cells. J Biol Chem. 1999 Aug  
590 6;274(32):22532–8.
- 591 13. Scaffidi C, Fulda S, Srinivasan A, Friesen C, Li F, Tomaselli KJ, et al. Two CD95 (APO-1/Fas)  
592 signaling pathways. The EMBO Journal. 1998 Mar 16;17(6):1675–87.
- 593 14. Jost PJ, Grabow S, Gray D, McKenzie MD, Nachbur U, Huang DCS, et al. XIAP discriminates  
594 between type I and type II FAS-induced apoptosis. Nature. 2009 Aug;460(7258):1035–9.

- 595 15. Ashkenazi A, Dixit VM. Death Receptors: Signaling and Modulation. *Science*. 1998 Aug  
596 28;281(5381):1305–8.
- 597 16. Boldin MP, Varfolomeev EE, Pancer Z, Mett IL, Camonis JH, Wallach D. A Novel Protein  
598 That Interacts with the Death Domain of Fas/APO1 Contains a Sequence Motif Related to  
599 the Death Domain. *J Biol Chem*. 1995 Apr 7;270(14):7795–8.
- 600 17. Kischkel FC, Lawrence DA, Chuntharapai A, Schow P, Kim KJ, Ashkenazi A. Apo2L/TRAIL-  
601 Dependent Recruitment of Endogenous FADD and Caspase-8 to Death Receptors 4 and 5.  
602 *Immunity*. 2000 Jun 1;12(6):611–20.
- 603 18. Sprick MR, Weigand MA, Rieser E, Rauch CT, Juo P, Blenis J, et al. FADD/MORT1 and  
604 Caspase-8 Are Recruited to TRAIL Receptors 1 and 2 and Are Essential for Apoptosis  
605 Mediated by TRAIL Receptor 2. *Immunity*. 2000 Jun 1;12(6):599–609.
- 606 19. Krueger A, Schmitz I, Baumann S, Krammer PH, Kirchhoff S. Cellular FLICE-inhibitory  
607 Protein Splice Variants Inhibit Different Steps of Caspase-8 Activation at the CD95 Death-  
608 inducing Signaling Complex. *J Biol Chem*. 2001 Jun 8;276(23):20633–40.
- 609 20. Salvesen GS, Dixit VM. Caspase activation: The induced-proximity model. *PNAS*. 1999 Sep  
610 28;96(20):10964–7.
- 611 21. Martin DA, Siegel RM, Zheng L, Lenardo MJ. Membrane Oligomerization and Cleavage  
612 Activates the Caspase-8 (FLICE/MACH $\alpha$ 1) Death Signal. *J Biol Chem*. 1998 Feb  
613 20;273(8):4345–9.
- 614 22. Boatright KM, Salvesen GS. Mechanisms of caspase activation. *Current Opinion in Cell  
615 Biology*. 2003 Dec 1;15(6):725–31.
- 616 23. Stennicke HR, Jürgensmeier JM, Shin H, Deveraux Q, Wolf BB, Yang X, et al. Pro-caspase-3  
617 Is a Major Physiologic Target of Caspase-8. *J Biol Chem*. 1998 Oct 16;273(42):27084–90.
- 618 24. Li H, Zhu H, Xu C, Yuan J. Cleavage of BID by Caspase 8 Mediates the Mitochondrial  
619 Damage in the Fas Pathway of Apoptosis. *Cell*. 1998 Aug 21;94(4):491–501.
- 620 25. Luo X, Budihardjo I, Zou H, Slaughter C, Wang X. Bid, a Bcl2 Interacting Protein, Mediates  
621 Cytochrome c Release from Mitochondria in Response to Activation of Cell Surface Death  
622 Receptors. *Cell*. 1998 Aug 21;94(4):481–90.
- 623 26. Desagher S, Osen-Sand A, Nichols A, Eskes R, Montessuit S, Lauper S, et al. Bid-induced  
624 Conformational Change of Bax Is Responsible for Mitochondrial Cytochrome c Release  
625 during Apoptosis. *The Journal of Cell Biology*. 1999 Mar 8;144(5):891–901.
- 626 27. Kelekar A, Thompson CB. Bcl-2-family proteins: the role of the BH3 domain in apoptosis.  
627 *Trends in Cell Biology*. 1998 Aug 1;8(8):324–30.

- 628 28. Oltval ZN, Milliman CL, Korsmeyer SJ. Bcl-2 heterodimerizes in vivo with a conserved  
629 homolog, Bax, that accelerates programmed cell death. *Cell*. 1993 Aug 27;74(4):609–19.
- 630 29. Leber B, Lin J, Andrews DW. Embedded together: The life and death consequences of  
631 interaction of the Bcl-2 family with membranes. *Apoptosis*. 2007 May 1;12(5):897–911.
- 632 30. Letai A, Bassik MC, Walensky LD, Sorcinelli MD, Weiler S, Korsmeyer SJ. Distinct BH3  
633 domains either sensitize or activate mitochondrial apoptosis, serving as prototype cancer  
634 therapeutics. *Cancer Cell*. 2002 Sep 1;2(3):183–92.
- 635 31. Yang E, Zha J, Jockel J, Boise LH, Thompson CB, Korsmeyer SJ. Bad, a heterodimeric  
636 partner for Bcl-xL and Bcl-2, displaces bax and promotes cell death. *Cell*. 1995 Jan  
637 27;80(2):285–91.
- 638 32. Kale J, Osterlund EJ, Andrews DW. BCL-2 family proteins: changing partners in the dance  
639 towards death. *Cell Death Differ*. 2018 Jan;25(1):65–80.
- 640 33. Tewari M, Quan LT, O'Rourke K, Desnoyers S, Zeng Z, Beidler DR, et al. Yama/CPP32 $\beta$ , a  
641 mammalian homolog of CED-3, is a CrmA-inhibitable protease that cleaves the death  
642 substrate poly(ADP-ribose) polymerase. *Cell*. 1995 Jun 2;81(5):801–9.
- 643 34. Nicholson DW, Ali A, Thornberry NA, Vaillancourt JP, Ding CK, Gallant M, et al.  
644 Identification and inhibition of the ICE/CED-3 protease necessary for mammalian  
645 apoptosis. *Nature*. 1995 Jul;376(6535):37–43.
- 646 35. Jost PJ, Grabow S, Gray D, McKenzie MD, Nachbur U, Huang DCS, et al. XIAP discriminates  
647 between type I and type II FAS-induced apoptosis. *Nature*. 2009 Aug;460(7258):1035–9.
- 648 36. Huang Y, Park YC, Rich RL, Segal D, Myszka DG, Wu H. Structural Basis of Caspase  
649 Inhibition by XIAP: Differential Roles of the Linker versus the BIR Domain. *Cell*. 2001 Mar  
650 9;104(5):781–90.
- 651 37. Suzuki Y, Nakabayashi Y, Takahashi R. Ubiquitin-protein ligase activity of X-linked  
652 inhibitor of apoptosis protein promotes proteasomal degradation of caspase-3 and  
653 enhances its anti-apoptotic effect in Fas-induced cell death. *PNAS*. 2001 Jul  
654 17;98(15):8662–7.
- 655 38. Shiozaki EN, Chai J, Rigotti DJ, Riedl SJ, Li P, Srinivasula SM, et al. Mechanism of XIAP-  
656 Mediated Inhibition of Caspase-9. *Molecular Cell*. 2003 Feb 1;11(2):519–27.
- 657 39. Zou H, Li Y, Liu X, Wang X. An APAF-1-Cytochrome c Multimeric Complex Is a Functional  
658 Apoptosome That Activates Procaspase-9. *J Biol Chem*. 1999 Apr 23;274(17):11549–56.
- 659 40. Adrain C, Creagh EM, Martin SJ. Apoptosis-associated release of Smac/DIABLO from  
660 mitochondria requires active caspases and is blocked by Bcl-2. *The EMBO Journal*. 2001  
661 Dec 3;20(23):6627–36.

- 662 41. Cowling V, Downward J. Caspase-6 is the direct activator of caspase-8 in the cytochrome  
663 c -induced apoptosis pathway: absolute requirement for removal of caspase-6  
664 prodomain. *Cell Death Differ.* 2002 Oct;9(10):1046–56.
- 665 42. Spencer SL, Gaudet S, Albeck JG, Burke JM, Sorger PK. Non-genetic origins of cell-to-cell  
666 variability in TRAIL-induced apoptosis. *Nature.* 2009 May;459(7245):428–32.
- 667 43. Skilling J. Nested sampling for general Bayesian computation. *Bayesian Anal.* 2006  
668 Dec;1(4):833–59.
- 669 44. Feroz F, Hobson MP, Bridges M. MultiNest: an efficient and robust Bayesian inference  
670 tool for cosmology and particle physics. *Mon Not R Astron Soc.* 2009 Oct 1;398(4):1601–  
671 14.
- 672 45. Feroz F, Hobson MP, Cameron E, Pettitt AN. Importance Nested Sampling and the  
673 MultiNest Algorithm. arXiv:13062144 [astro-ph, physics:physics, stat] [Internet]. 2013 Jun  
674 10 [cited 2019 May 14]; Available from: <http://arxiv.org/abs/1306.2144>
- 675 46. Buchner J, Georgakakis A, Nandra K, Hsu L, Rangel C, Brightman M, et al. X-ray spectral  
676 modelling of the AGN obscuring region in the CDFS: Bayesian model selection and  
677 catalogue. *A&A.* 2014 Apr 1;564:A125.
- 678 47. Burnham KP, Anderson DR. Model Selection and Multimodel Inference: A Practical  
679 Information-Theoretic Approach [Internet]. 2nd ed. New York: Springer-Verlag; 2002  
680 [cited 2019 Apr 24]. Available from: <https://www.springer.com/us/book/9780387953649>
- 681 48. Symonds MRE, Moussalli A. A brief guide to model selection, multimodel inference and  
682 model averaging in behavioural ecology using Akaike’s information criterion. *Behav Ecol*  
683 *Sociobiol.* 2011 Jan 1;65(1):13–21.
- 684 49. Shockley EM, Rouzer CA, Marnett LJ, Deeds EJ, Lopez CF. Signal integration and  
685 information transfer in an allosterically regulated network. *npj Syst Biol Appl.* 2019 Jul  
686 18;5(1):1–9.
- 687 50. Dai H, Ding H, Peterson KL, Meng XW, Schneider PA, Knorr KLB, et al. Measurement of  
688 BH3-only protein tolerance. *Cell Death and Differentiation.* 2018 Jan 1;25(2):282–93.
- 689 51. Eissing T, Conzelmann H, Gilles ED, Allgöwer F, Bullinger E, Scheurich P. Bistability  
690 Analyses of a Caspase Activation Model for Receptor-induced Apoptosis. *J Biol Chem.*  
691 2004 Aug 27;279(35):36892–7.
- 692 52. Aldridge BB, Gaudet S, Lauffenburger DA, Sorger PK. Lyapunov exponents and phase  
693 diagrams reveal multi-factorial control over TRAIL-induced apoptosis. *Molecular Systems*  
694 *Biology.* 2011 Jan 1;7(1):553.

695

- 696 53. Eydgahi H, Chen WW, Muhlich JL, Vitkup D, Tsitsiklis JN, Sorger PK. Properties of cell  
697 death models calibrated and compared using Bayesian approaches. *Molecular Systems*  
698 *Biology*. 2013 Jan 1;9(1):644.
- 699 54. Aitken S, Akman OE. Nested sampling for parameter inference in systems biology:  
700 application to an exemplar circadian model. *BMC Systems Biology*. 2013 Jul 30;7(1):72.
- 701 55. Pullen N, Morris RJ. Bayesian Model Comparison and Parameter Inference in Systems  
702 *Biology Using Nested Sampling*. *PLOS ONE*. 2014 Feb 11;9(2):e88419.
- 703 56. Xu T-R, Vyshemirsky V, Gormand A, Kriegsheim A von, Girolami M, Baillie GS, et al.  
704 Inferring Signaling Pathway Topologies from Multiple Perturbation Measurements of  
705 Specific Biochemical Species. *Sci Signal*. 2010 Mar 16;3(113):ra20–ra20.
- 706 57. MacKay DJC, Kay DJCM. *Information Theory, Inference and Learning Algorithms*.  
707 Cambridge University Press; 2003. 696 p.
- 708 58. Certo M, Moore VDG, Nishino M, Wei G, Korsmeyer S, Armstrong SA, et al. Mitochondria  
709 primed by death signals determine cellular addiction to antiapoptotic BCL-2 family  
710 members. *Cancer Cell*. 2006 May 1;9(5):351–65.
- 711 59. Burnham KP, Anderson DR. *Model Selection and Multimodel Inference: A Practical*  
712 *Information-Theoretic Approach* [Internet]. 2nd ed. New York: Springer-Verlag; 2002  
713 [cited 2019 Oct 26]. Available from: <https://www.springer.com/gp/book/9780387953649>
- 714 60. Symonds MRE, Moussalli A. A brief guide to model selection, multimodel inference and  
715 model averaging in behavioural ecology using Akaike’s information criterion. *Behav Ecol*  
716 *Sociobiol*. 2011 Jan 1;65(1):13–21.
- 717 61. Handley WJ, Hobson MP, Lasenby AN. PolyChord: next-generation nested sampling. *Mon*  
718 *Not R Astron Soc*. 2015 Nov 11;453(4):4385–99.

719

## 720 **Supporting information**

721 Table S1

722 Table S2

723 Table S3

724 Table S4

725 Table S5

726 Table S6

727 Figures S1-S4

## 728 **Figures Legends:**

729 **Figure 1. General workflow for the analysis of network dynamics using trends in expected values.** The target  
730 network is first deconstructed into subnetworks that effectively represent in silico knockouts. A model for each  
731 subnetwork and each incremental set of regulatory conditions is then created and passed to an algorithm for  
732 estimation of the expected value for an aspect of signal transduction. The expected value is calculated via  
733 integration of a user-defined objective function that quantifies that aspect of signal transduction over a range of  
734 parameter values (the prior). The trends in the expected values over changing regulatory conditions are then  
735 compared to make qualitative inferences regarding network dynamics. In a complimentary method, the full model  
736 is retained but the objective function is targeted to different pathways. Inferences on network dynamics can again  
737 be made via comparison of the trends in the expected values.

738

739 **Figure 2. Extrinsic apoptosis subnetworks and the likelihood of achieving apoptosis.** (A) The direct caspase  
740 subnetwork. (B) The direct caspase + mitochondrial activation subnetwork. (C) The direct caspase + mitochondrial  
741 inhibition of XIAP subnetwork network. (D) The mitochondrial activation subnetwork. (E) The complete network.  
742 (F) the mitochondrial subnetwork. (G) Trends in expected values for each of the networks in (A)-(F) over a range of  
743 values for the apoptosis inhibitor XIAP and for an objective function that computes the proportion of PARP  
744 cleavage (a proxy for cell death) at the end of the in silico experimental simulation.

745

746 **Figure 3. Expected values for PARP cleavage and pathway flux at low and high DISC component values.** (A)  
747 Expected values for PARP cleavage for the caspase pathway and complete network under both low and high DISC  
748 conditions (100 and 130,000 molecules per cell of FADD and Caspase-8 respectively) over a range of XIAP values.  
749 (B) Expected values for signal flux through both pathways as well as the total signal flux under high DISC  
750 conditions. (C) Expected values for signal flux through both pathways as well as the total signal flux under low DISC  
751 conditions.

752

753 **Figure 4. Trends in expected value ratios under increasing levels of the apoptotic inhibitor XIAP for an inhibited  
754 and uninhibited mitochondrial pathway.** (A) Expected value trends for the caspase pathway (green),  
755 mitochondrial pathway (blue), and complete network (orange) with no MOMP inhibition. (B) Trends for the  
756 mitochondria/caspase (blue) and the complete/caspase (orange) expected value ratios from the trends in (A). (C)  
757 Expected value trends for the caspase pathway (green), mitochondrial pathway (blue), and complete network  
758 (orange) with MOMP inhibitory protein BCL-2 at 328,000 mol. per cell. (D) Trends for the mitochondria/caspase  
759 (blue) and the complete/caspase (orange) evidence ratios from the trends in (C).

760

761 **Figure 5. Precision vs. computational cost.** (A) and (B) Average number of evaluations before termination of the  
762 MultiNest algorithm over a range of population sizes for the caspase pathway and complete network respectively.  
763 (C) and (D) Average of error estimates from MultiNest for each population size and the caspase and complete  
764 networks. (E) and (F) Average estimated CPU clock time over each population size for the caspase and complete  
765 networks respectively. \*MultiNest was unable to estimate the error at XIAP = 0.

766

767



## 768 **Box 1. Extrinsic apoptosis execution.**

769 Extrinsic apoptosis is a receptor mediated process for programmed cell death. The Type I/II phenotypes for the  
770 extrinsic apoptosis system were first described by Scaffidi et al. [13]. In that work they examined several cell lines  
771 and classified them into those that required the mitochondrial pathway to achieve apoptosis (Type II) and those  
772 that don't (Type I). They made several interesting conclusions. They found that Type II cells had relatively weak  
773 DISC formation, that both phenotypes responded equally well to receptor mediated cell death, that there was a  
774 delay in caspase activation in Type II cells, and that caspase activation happened upstream of mitochondrial  
775 activation in Type I cells and downstream in Type II. More recently, XIAP has also been put forth as a critical  
776 regulator in the choice of apoptotic phenotype. In Jost et al. [14] they examined hepatocytes (Type II cells) and  
777 lymphocytes (Type I cells) under different conditions to examine the role XIAP plays in Type I/II determination.  
778 They made several observations upon Fas ligand or Fas-antibody induced apoptosis such as higher levels of XIAP in  
779 Type II cells and higher caspase effector activity in XIAP/Bid deficient mice versus apoptosis resistant Bid-only  
780 knockouts. In all, they concluded that XIAP is the key regulator that determines the choice of pathway.

781 Extrinsic apoptosis is initiated when a death inducing member of the tumor necrosis factor (TNF) superfamily of  
782 receptors (FasR, TNFR1, etc.) is bound by its respective ligand (FasL, TNF- $\alpha$ , etc.), setting off a sequence  
783 biochemical events that result in the orderly deconstruction of the cell [15]. The first stage of this sequence is the  
784 assembly of the DISC at the cell membrane ① and the subsequent activation of Caspase-8. Upon ligand binding  
785 and oligomerization of a receptor such as FasR or TRAIL, an adapter protein, like FADD (Fas-associated protein with  
786 death domain), is recruited to the receptors cytoplasmic tail [16, 17, 18]. FADD, in turn, recruits Caspase-8 via their  
787 respective death effector domains (DEDs), thus completing DISC formation [17, 18]. Other DISC components could  
788 also be included here, such as the regulator cFlip [19]. Once recruited, proximal Procaspase-8 monomers dimerize,  
789 inducing their autoproteolytic activity and producing active Caspase-8 [20, 21, 22].

790 After Caspase-8 activation the apoptotic signal can progress down two distinct pathways that both lead to the  
791 activation of Caspase-3 and the ensuing proteolysis of downstream targets. One pathway consists of a caspase  
792 cascade in which active Caspase-8 directly cleaves and activates Caspase-3 ② [23], while another, more complex  
793 pathway is routed through the mitochondria. In the mitochondrial pathway Caspase-8 cleaves the pro-apoptotic  
794 Bcl-2 family protein Bid in the cytosol, which then migrates to the mitochondria ③ where it initiates  
795 mitochondrial outer membrane permeabilization (MOMP) and the release of pro-apoptotic factors that lead to  
796 Caspase-3 activation [24, 25].

797 MOMP has its own set of regulators that govern the strength of apoptotic signaling through the mitochondria ④.  
798 After Caspase-8 activated Bid, (tBid), migrates to the mitochondria it activates proteins in the outer mitochondrial  
799 membrane, such as Bax, that subsequently self-aggregate into membrane pores and allow exportation of  
800 Cytochrome-c and Smac/DIABLO to the cytosol [26]. Bid and Bax are examples of pro-apoptotic proteins from the  
801 Bcl-2 family, all of which share BH domain homology [27]. Other members of this family act as MOMP regulators;  
802 the anti-apoptotic Bcl-2, for example, binds and inhibits both Bid and Bax while the pro-apoptotic Bad similarly  
803 binds and inhibits its target, Bcl-2 [28, 29, 30, 31]. Many other pro- and anti-apoptotic members of the Bcl-2 family  
804 have been discovered and together regulate MOMP [32].

805 Regardless of which pathway is chosen, the intermediate results are Caspase-3 activation and subsequent cleavage  
806 of PARP ⑧, a proxy for cell death in the analyses here [33, 34]. XIAP (X-linked inhibitor of apoptosis protein) is an  
807 inhibitor of Caspase-3 and has been proposed to be a key regulator in determining the Type I/II apoptotic  
808 phenotype of a cell [35]. XIAP sequesters Caspase-3 but also contains a ubiquitin ligase domain that directly targets  
809 Caspase-3 for degradation. The inhibitor also sequesters and inhibits the Caspase-3 activating Caspase-9 residing  
810 within the apoptosome complex [36, 37, 38]. Apoptosome formation is initiated by Cytochrome-c exported from  
811 the mitochondria during MOMP ⑤. Cytochrome-c induces the protein APAF-1 to oligomerize and subsequently  
812 recruit and activate Caspase-9, thus forming the complex [39]. Another MOMP export, the protein Smac/DIABLO  
813 ⑥, binds and inhibits XIAP, working in tandem with Cytochrome-c to oppose XIAP and carry out the apoptosis  
814 inducing activity of the Type II pathway [40]. Finally, Procaspase/Caspase-6 constitutes a feed forward loop  
815 between Caspase-3 and Caspase-8 ⑦ [41].

816



817 **Figures:**  
818 **Figure 1.**

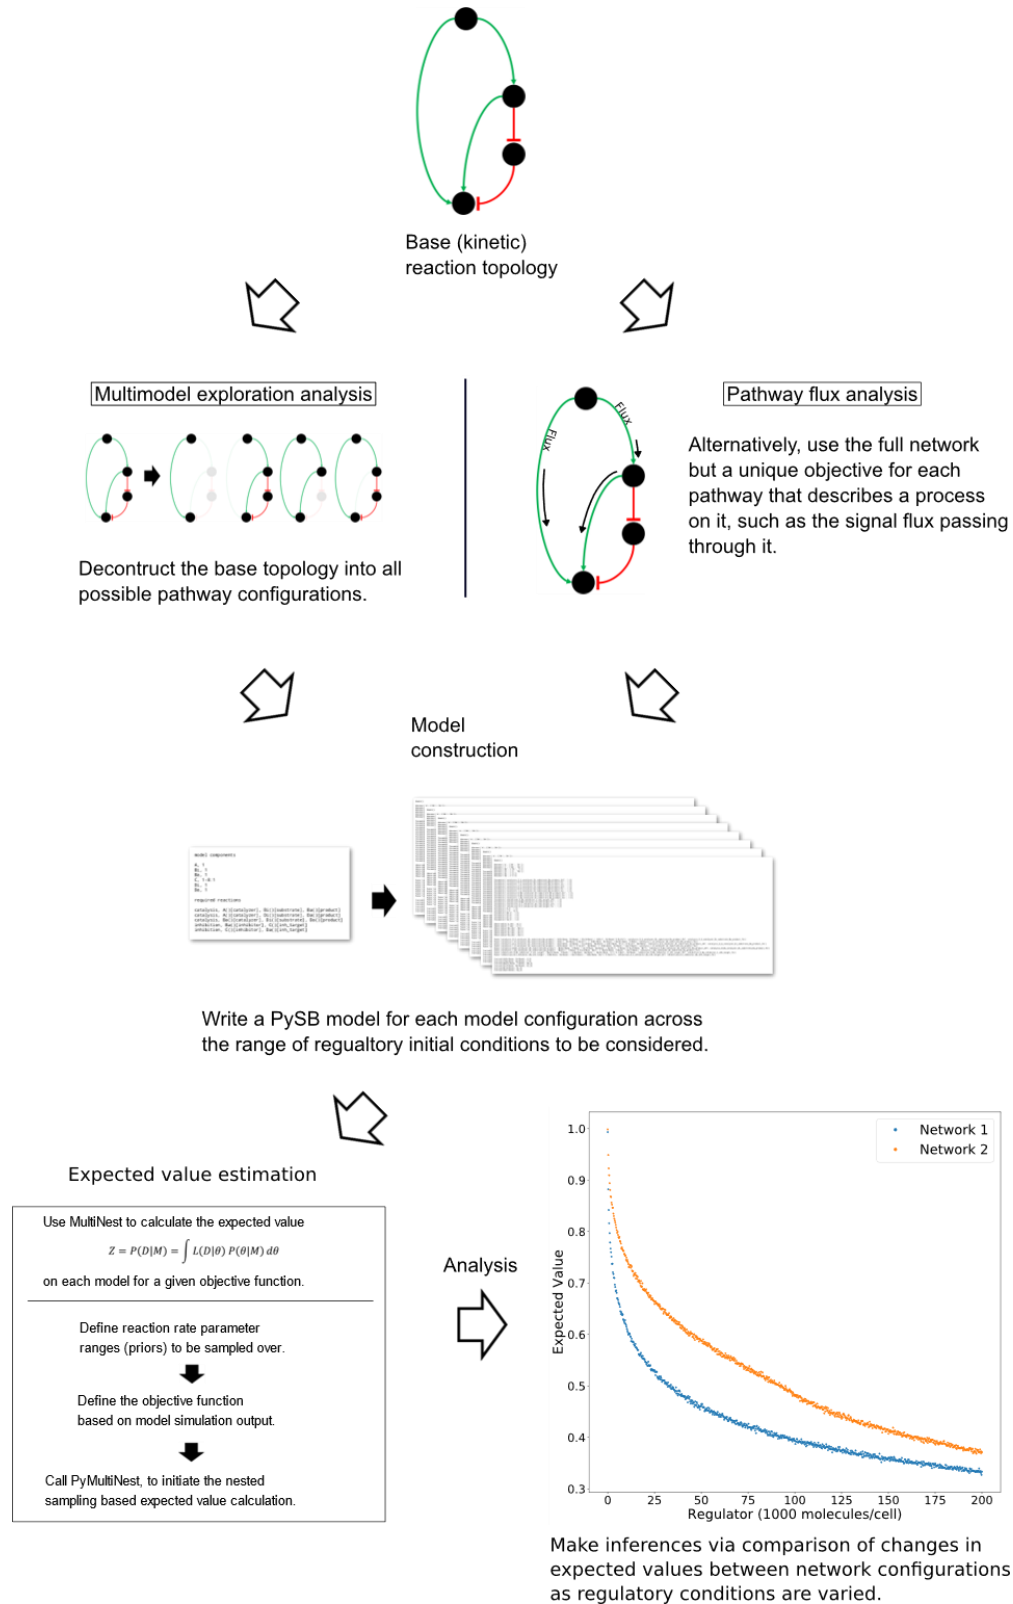

819

820 **Figure 2.**

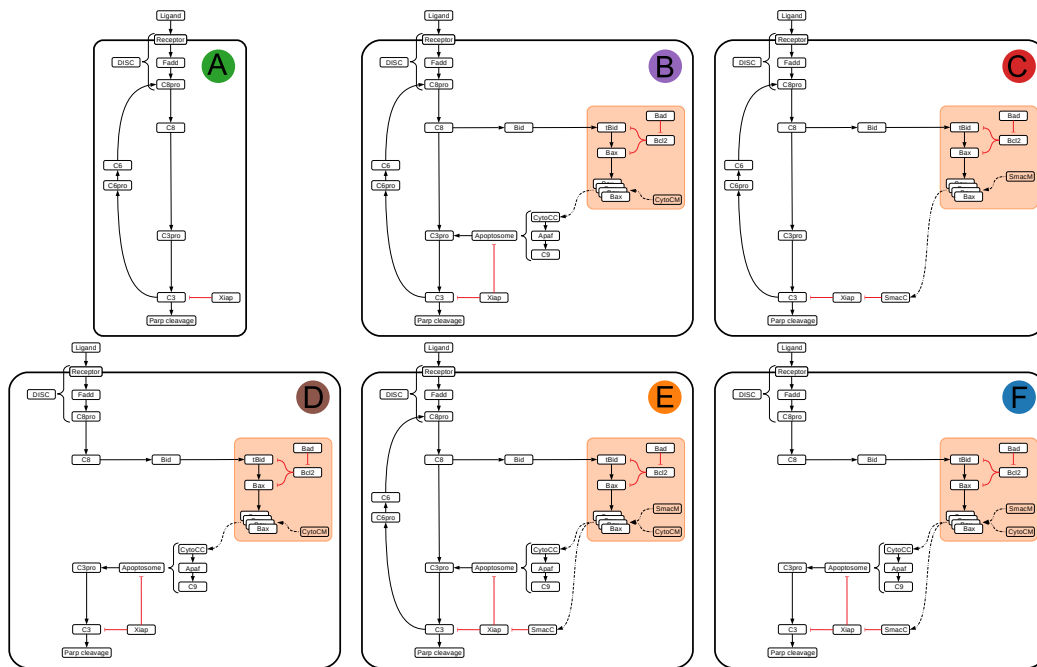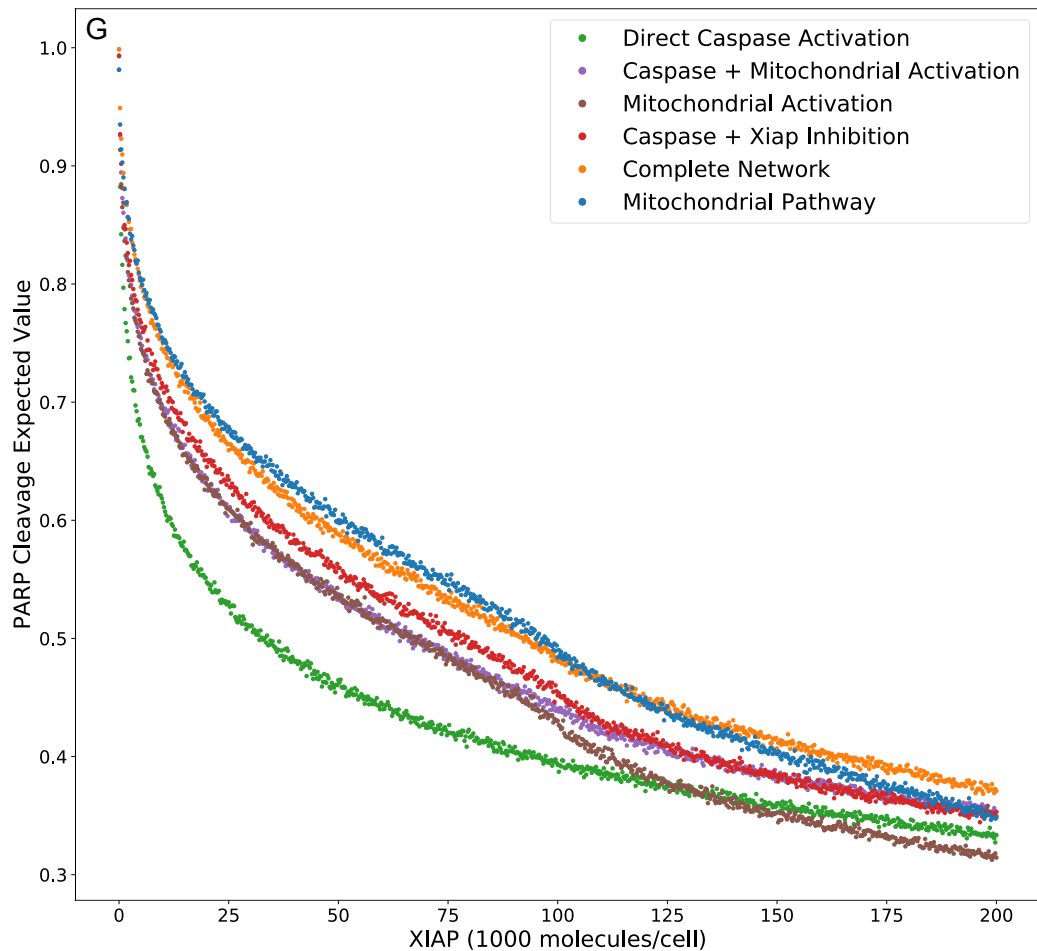

821

822 **Figure 3.**

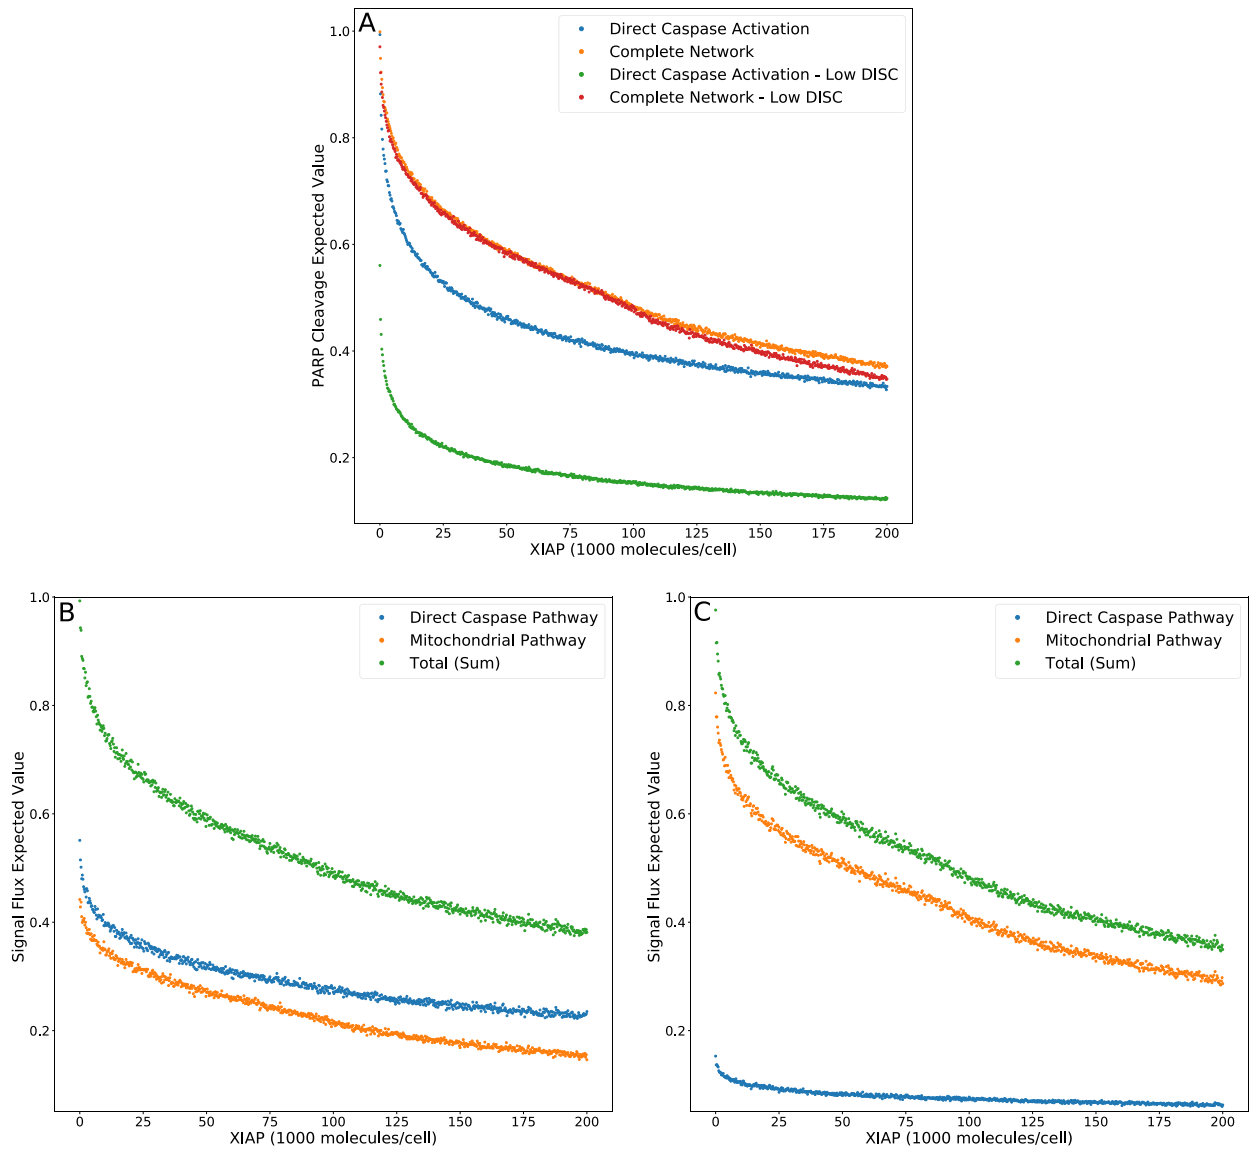

823

824

825

826

827

828 **Figure 4.**

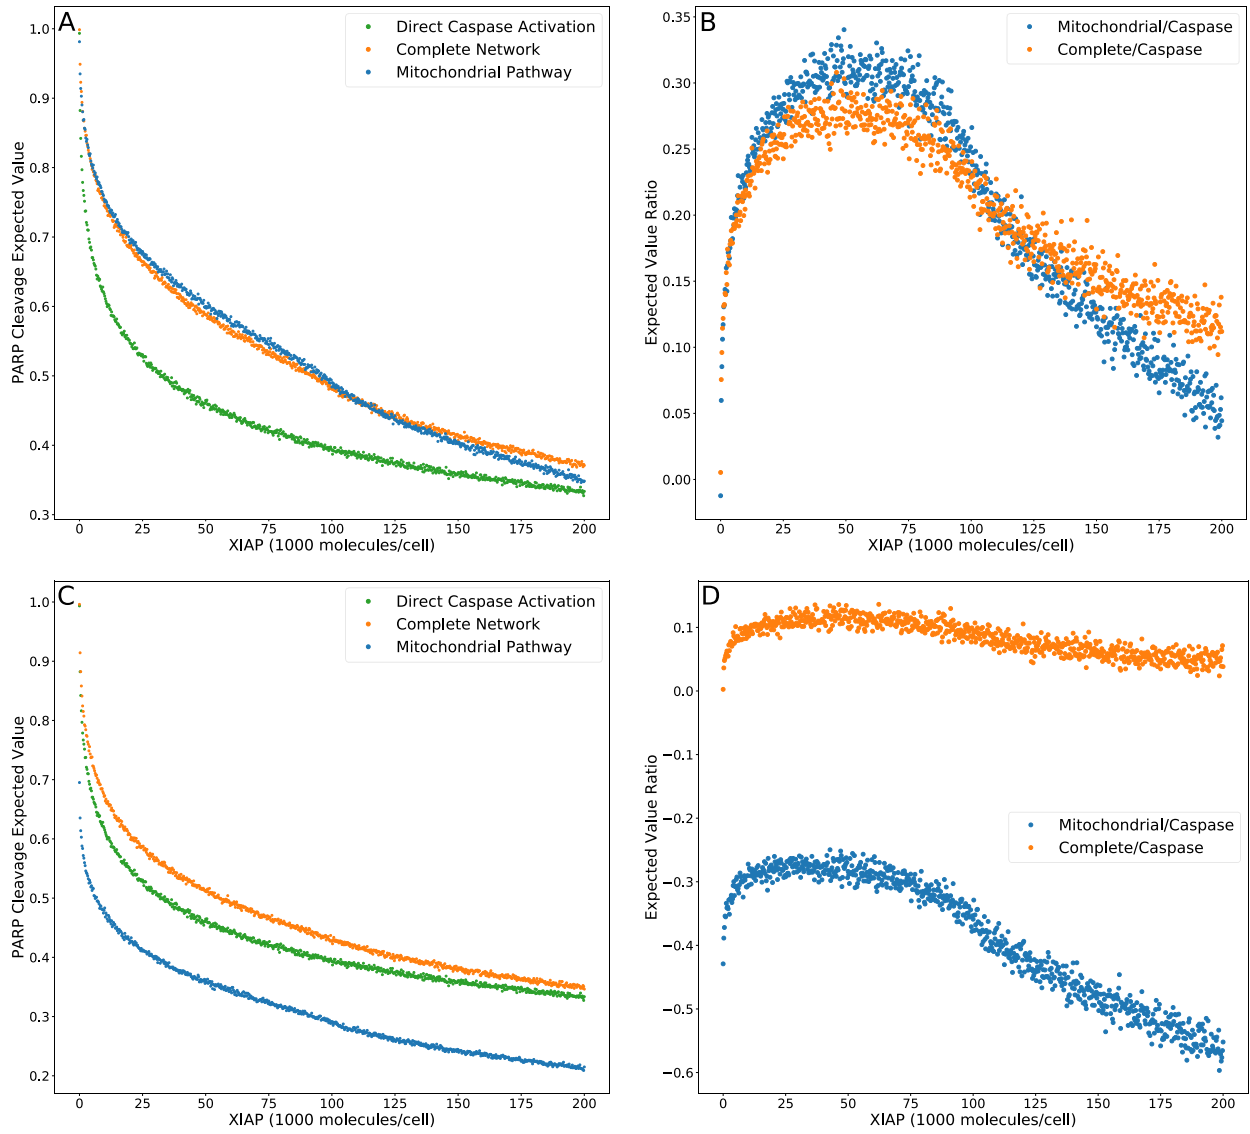

829

830

831

832

833

834

835 **Figure 5.**

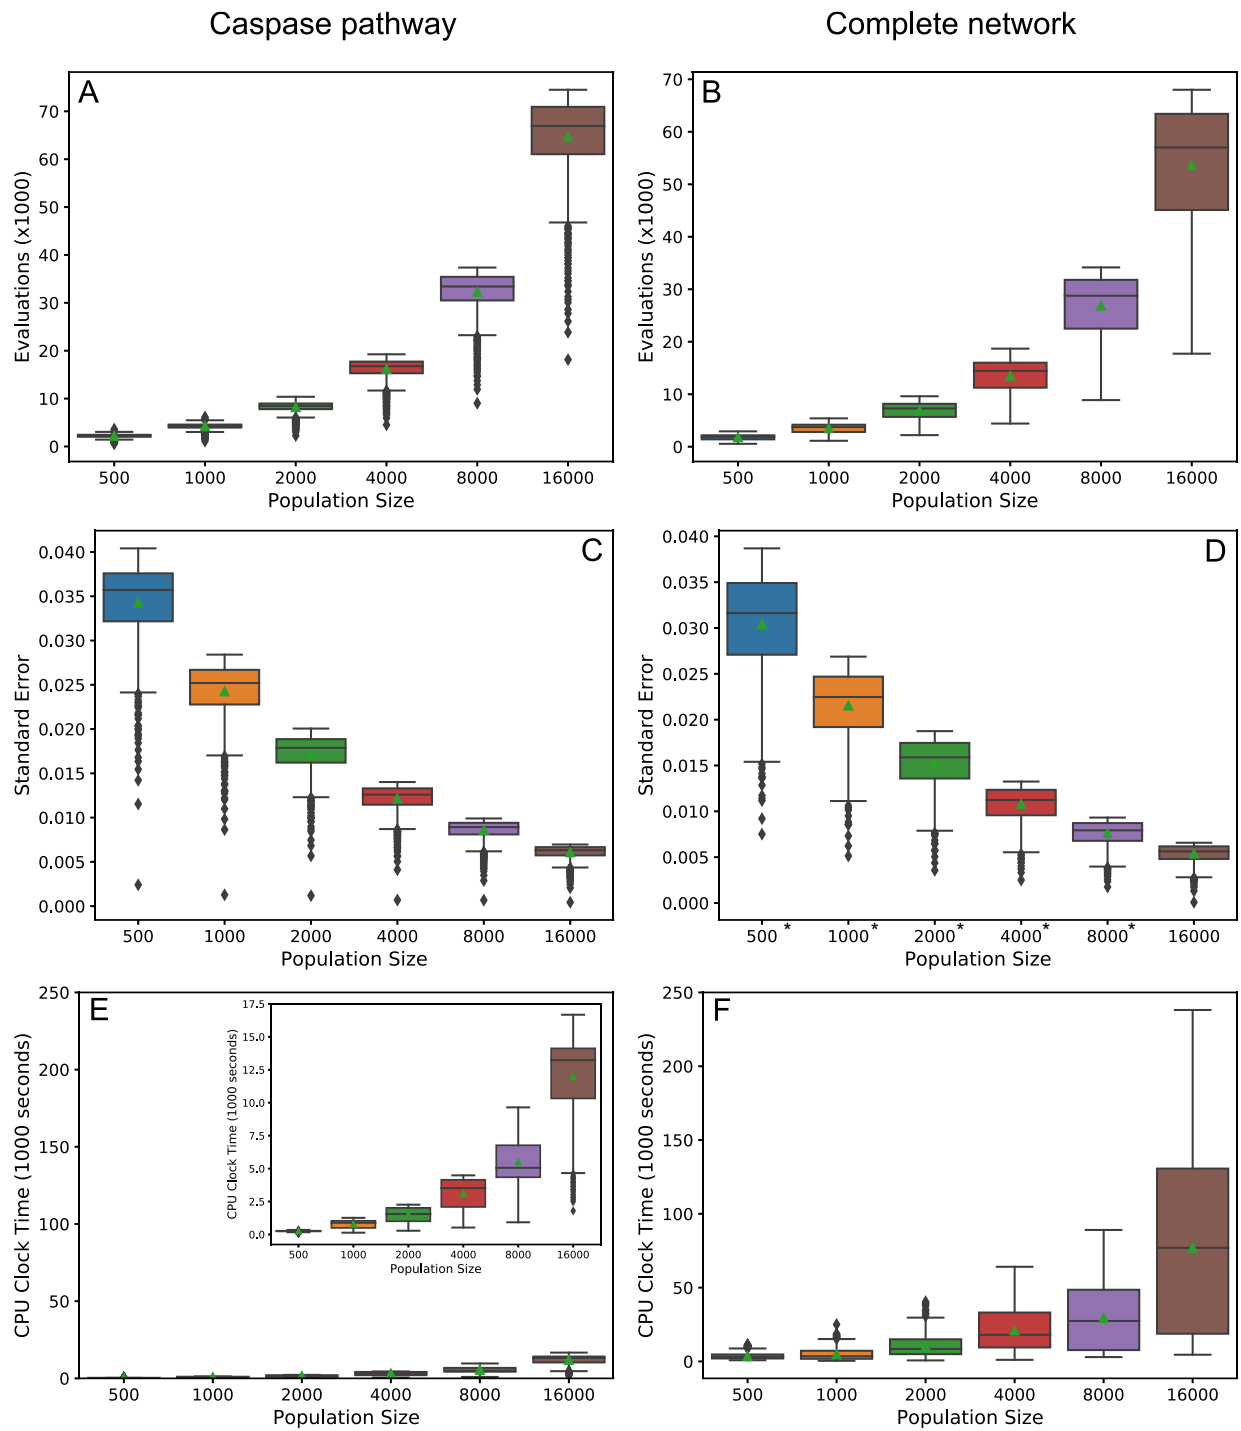

836

837

838

839 **Box 1.**

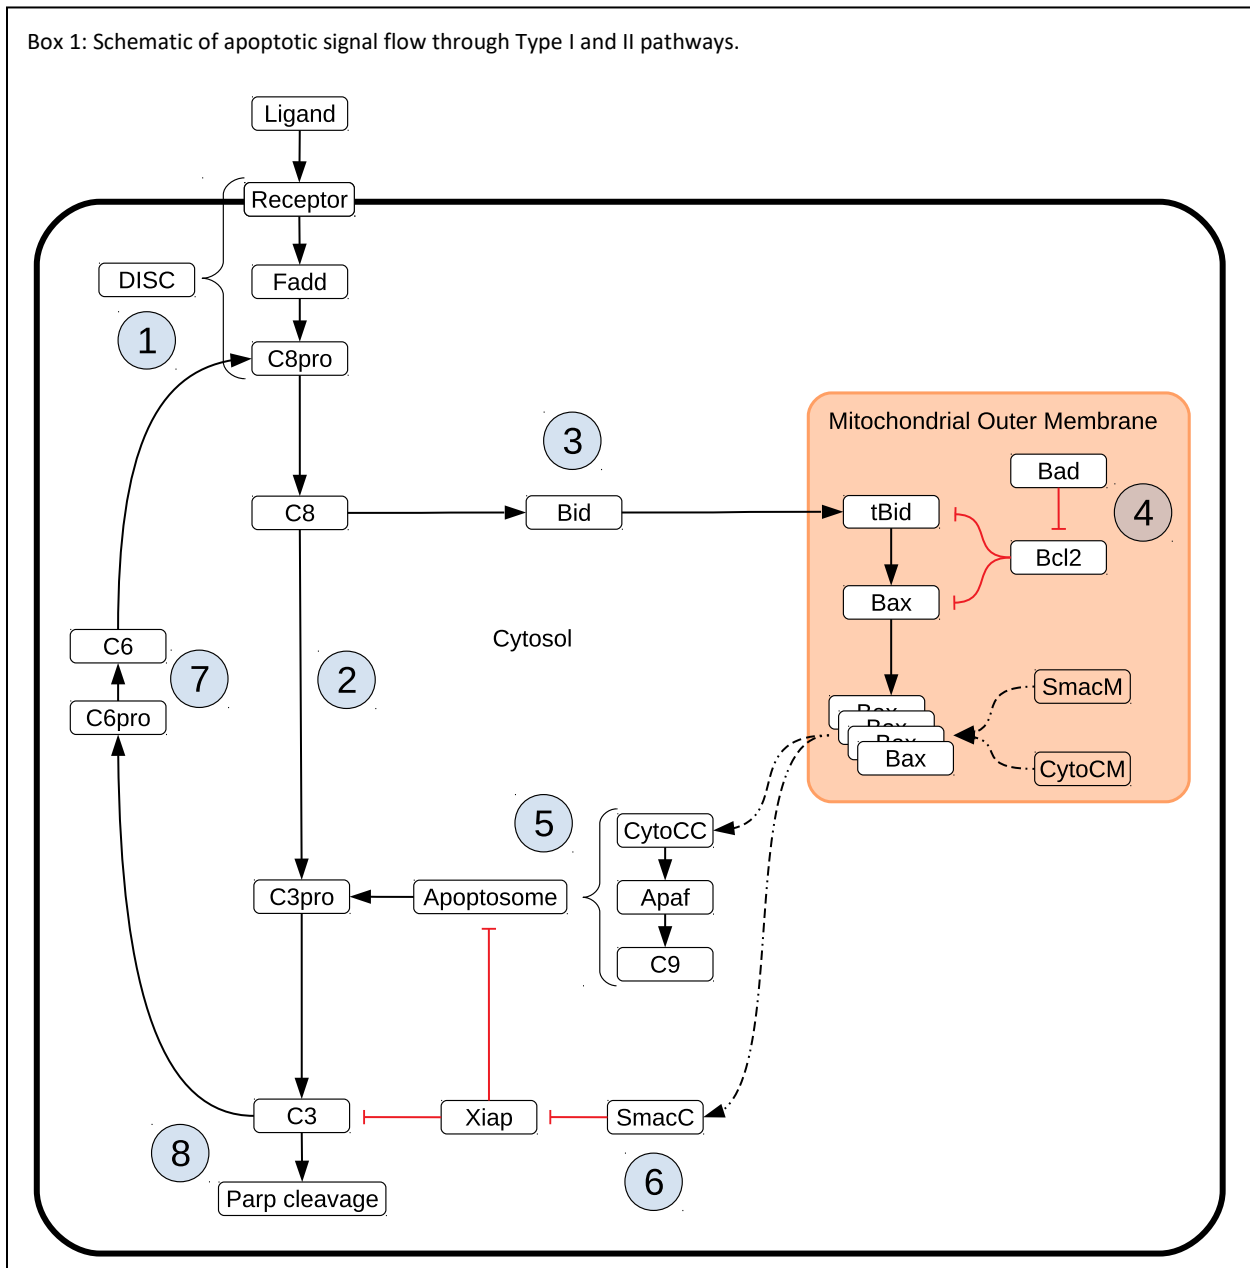

840
